# Supplementary material for: Estimated global cancer incidence in the oldest adults in 2018 and projections to 2050
Source: PubMed Central journal article supplement (PMC7754149; doi:10.1002/ijc.33232), 2020-08-17
Supplement: IJC-148-601-s001.pdf [file IJC-148-601-s001.pdf]

## **Global cancer incidence in the oldest adults in 2018 and projections to 2050**

Sophie Pilleron, Enrique Soto-Perez-de-Celis, Jerome Vignat, Jacques Ferlay, Isabelle Soerjomataram, Freddie Bray, Diana Sarfati

### **Table of content**

#### **Supplementary Tables**

Supplementary Table. Number of new cancer cases in adults aged 80 or older, percentage of total cases (all age combined), percentage of the total population aged 80 years or older, and age-standardised incidence rates (ASRs) by country, 2018

#### **Supplementary Figures**

Supplementary Figure 1. Cancer profile in females aged 65-79 years by world region, 2018

Supplementary Figure 2. Cancer profile in males aged 65-79 years by world region, 2018

**Supplementary Table.** Number of new cancer cases in adults aged 80 or older, percentage of total cases (all age combined), percentage of the total population aged 80 years or older, and age-standardised incidence rates (ASRs) by country, 2018

| Country                              | New cancers cases among 80+ | % total new cancer cases | % total population aged 80+ | ASRs  |
|--------------------------------------|-----------------------------|--------------------------|-----------------------------|-------|
| Afghanistan                          | 500                         | 2.8                      | 0.3                         | 548   |
| Albania                              | 1,000                       | 13.0                     | 2.8                         | 1,250 |
| Algeria                              | 4,200                       | 8.2                      | 1.3                         | 797   |
| Angola                               | 800                         | 5.4                      | 0.3                         | 865   |
| Argentina                            | 18,800                      | 15.1                     | 2.8                         | 1,491 |
| Armenia                              | 1,600                       | 18.8                     | 3.3                         | 1,654 |
| Australia                            | 26,500                      | 19.1                     | 4.1                         | 2,634 |
| Austria                              | 8,000                       | 19.0                     | 5.4                         | 1,715 |
| Azerbaijan                           | 1,000                       | 9.3                      | 1.4                         | 773   |
| Bahamas                              | 100                         | 9.0                      | 1.8                         | 1,117 |
| Bahrain                              | 100                         | 5.6                      | 0.3                         | 1,148 |
| Bangladesh                           | 10,700                      | 7.2                      | 1.1                         | 592   |
| Barbados                             | 100                         | 15.2                     | 3.6                         | 1,845 |
| Belarus                              | 4,500                       | 11.1                     | 4.0                         | 1,175 |
| Belgium                              | 14,000                      | 19.5                     | 5.7                         | 2,142 |
| Belize                               | 40                          | 11.4                     | 0.6                         | 1,681 |
| Benin                                | 500                         | 6.9                      | 0.4                         | 1,112 |
| Bhutan                               | 100                         | 8.8                      | 1.0                         | 622   |
| Bolivia                              | 2,000                       | 14.2                     | 1.6                         | 1,162 |
| Bosnia Herzegovina                   | 1,500                       | 11.4                     | 4.4                         | 958   |
| Botswana                             | 100                         | 6.7                      | 0.5                         | 1,032 |
| Brazil                               | 65,200                      | 12.4                     | 1.8                         | 1,714 |
| Brunei Darussalam                    | 100                         | 8.7                      | 0.7                         | 2,439 |
| Bulgaria                             | 4,000                       | 12.1                     | 4.8                         | 1,203 |
| Burkina Faso                         | 300                         | 3.5                      | 0.2                         | 832   |
| Burundi                              | 400                         | 5.1                      | 0.4                         | 1,059 |
| Cambodia                             | 1,000                       | 7.0                      | 0.6                         | 1,146 |
| Cameroon                             | 700                         | 5.1                      | 0.5                         | 704   |
| Canada                               | 35,800                      | 17.7                     | 4.4                         | 2,214 |
| Cape Verde                           | 100                         | 27.8                     | 1.3                         | 2,812 |
| Central African Republic             | 100                         | 6.5                      | 0.5                         | 671   |
| Chad                                 | 200                         | 3.8                      | 0.3                         | 578   |
| Chile                                | 9,600                       | 18.9                     | 2.6                         | 2,036 |
| Colombia                             | 12,500                      | 12.9                     | 1.5                         | 1,724 |
| Comoros                              | 0                           | 3.7                      | 0.4                         | 512   |
| Congo, Democratic People Republic of | 3,000                       | 6.3                      | 0.4                         | 971   |
| Congo, Republic of                   | 200                         | 8.9                      | 0.5                         | 759   |
| Costa Rica                           | 1,900                       | 16.8                     | 2.1                         | 1,888 |
| Cote d'Ivoire                        | 700                         | 4.9                      | 0.3                         | 1,003 |
| Croatia                              | 4,400                       | 18.6                     | 5.5                         | 1,952 |
| Cuba                                 | 7,100                       | 16.9                     | 3.9                         | 1,573 |
| Cyprus                               | 700                         | 16.7                     | 3.1                         | 2,088 |
| Czechia                              | 8,800                       | 14.4                     | 4.1                         | 2,024 |
| Denmark                              | 6,200                       | 16.5                     | 4.5                         | 2,408 |
| Djibouti                             | 0                           | 2.9                      | 0.6                         | 309   |
| Dominican Republic                   | 2,400                       | 13.5                     | 1.7                         | 1,285 |
| Ecuador                              | 4,900                       | 18.3                     | 1.6                         | 1,890 |
| Egypt                                | 9,400                       | 7.4                      | 0.8                         | 1,213 |
| El Salvador                          | 2,200                       | 22.4                     | 2.0                         | 1,874 |
| Equatorial Guinea                    | 0                           | 3.9                      | 0.4                         | 564   |

|                                      |         |      |     |       |
|--------------------------------------|---------|------|-----|-------|
| Eritrea                              | 100     | 4.6  | 0.5 | 529   |
| Estonia                              | 1,400   | 18.9 | 5.7 | 1,891 |
| Ethiopia                             | 2,200   | 3.4  | 0.5 | 409   |
| Fiji                                 | 0       | 3.2  | 0.7 | 718   |
| Finland                              | 6,600   | 21.2 | 5.4 | 2,229 |
| France (metropolitan)                | 83,600  | 20.3 | 6.2 | 2,064 |
| France, Guadeloupe                   | 300     | 16.7 | 4.8 | 1,678 |
| France, La Reunion                   | 400     | 14.3 | 2.6 | 1,741 |
| France, Martinique                   | 300     | 18.8 | 5.5 | 1,723 |
| France, New Caledonia                | 100     | 13.9 | 2.0 | 2,917 |
| French Guyana                        | 0       | 8.2  | 0.8 | 2,041 |
| French Polynesia                     | 100     | 8.1  | 1.3 | 1,727 |
| Gabon                                | 100     | 9.2  | 0.9 | 842   |
| Georgia                              | 1,200   | 13.4 | 3.8 | 823   |
| Germany                              | 118,500 | 22.3 | 6.6 | 2,196 |
| Ghana                                | 1,400   | 6.4  | 0.4 | 1,119 |
| Greece                               | 14,700  | 22.8 | 6.7 | 1,993 |
| Guam                                 | 100     | 14.7 | 2.0 | 1,779 |
| Guatemala                            | 2,400   | 15.3 | 1.1 | 1,373 |
| Guinea                               | 300     | 5.5  | 0.3 | 980   |
| Guinea-Bissau                        | 40      | 4.1  | 0.3 | 788   |
| Guyana                               | 100     | 8.8  | 0.8 | 1,019 |
| Haiti                                | 1,900   | 16.1 | 0.8 | 2,280 |
| Honduras                             | 900     | 9.4  | 1.0 | 937   |
| Hungary                              | 8,900   | 13.4 | 4.3 | 2,118 |
| Iceland                              | 200     | 16.6 | 3.8 | 1,853 |
| Indonesia                            | 15,300  | 4.5  | 0.7 | 784   |
| Iran, Islamic Republic of            | 13,000  | 12.2 | 1.0 | 1,632 |
| Iraq                                 | 1,100   | 4.7  | 0.5 | 625   |
| Ireland                              | 3,800   | 14.9 | 3.2 | 2,535 |
| Israel                               | 4,700   | 17.7 | 3.1 | 1,820 |
| Italy                                | 88,600  | 23.4 | 7.4 | 2,034 |
| Jamaica                              | 1,000   | 15.0 | 2.6 | 1,474 |
| Japan                                | 266,800 | 30.5 | 8.4 | 2,504 |
| Jordan                               | 800     | 7.7  | 0.6 | 1,417 |
| Kazakhstan                           | 2,200   | 6.8  | 1.4 | 808   |
| Kenya                                | 2,500   | 5.5  | 0.4 | 1,182 |
| Korea, Democratic People Republic of | 4,400   | 8.0  | 1.6 | 1,081 |
| Korea, Republic of                   | 30,600  | 11.2 | 3.2 | 1,840 |
| Kuwait                               | 100     | 3.5  | 0.2 | 1,403 |
| Kyrgyzstan                           | 400     | 7.7  | 1.0 | 787   |
| Lao People Democratic Republic       | 400     | 5.3  | 0.6 | 981   |
| Latvia                               | 2,000   | 17.4 | 5.6 | 1,916 |
| Lebanon                              | 2,600   | 15.6 | 1.8 | 2,416 |
| Lesotho                              | 200     | 11.7 | 0.7 | 1,393 |
| Liberia                              | 100     | 5.0  | 0.3 | 899   |
| Libya                                | 400     | 7.8  | 0.8 | 978   |
| Lithuania                            | 2,700   | 17.3 | 5.7 | 1,682 |
| Luxembourg                           | 500     | 19.2 | 4.1 | 2,358 |
| Macedonia                            | 600     | 8.4  | 2.5 | 1,200 |
| Madagascar                           | 900     | 5.3  | 0.4 | 846   |
| Malawi                               | 300     | 2.0  | 0.4 | 519   |
| Malaysia                             | 3,400   | 7.9  | 1.0 | 1,096 |
| Maldives                             | 20      | 5.7  | 0.9 | 585   |
| Mali                                 | 400     | 3.4  | 0.3 | 853   |
| Malta                                | 300     | 17.7 | 4.1 | 2,242 |
| Mauritania                           | 100     | 4.6  | 0.4 | 741   |

|                       |        |      |     |       |
|-----------------------|--------|------|-----|-------|
| Mauritius             | 300    | 12.2 | 2.0 | 1,360 |
| Mexico                | 20,700 | 11.4 | 1.6 | 985   |
| Moldova               | 900    | 6.3  | 2.3 | 956   |
| Mongolia              | 400    | 7.3  | 0.6 | 2,075 |
| Montenegro            | 200    | 11.3 | 3.5 | 1,124 |
| Morocco               | 3,300  | 6.5  | 1.2 | 791   |
| Mozambique            | 800    | 3.6  | 0.4 | 670   |
| Myanmar               | 2,900  | 4.4  | 0.8 | 675   |
| Namibia               | 100    | 5.6  | 0.5 | 912   |
| Nepal                 | 2,000  | 8.1  | 0.8 | 935   |
| New Zealand           | 4,600  | 18.5 | 3.7 | 2,624 |
| Nicaragua             | 1,000  | 13.1 | 1.3 | 1,237 |
| Niger                 | 200    | 2.9  | 0.2 | 476   |
| Nigeria               | 2,300  | 2.0  | 0.2 | 534   |
| Norway                | 5,600  | 17.7 | 4.2 | 2,537 |
| Oman                  | 100    | 3.3  | 0.4 | 553   |
| Pakistan              | 6,500  | 3.9  | 0.7 | 474   |
| Palestine             | 400    | 10.4 | 0.4 | 2,319 |
| Panama                | 1,400  | 18.4 | 1.9 | 1,773 |
| Papua New Guinea      | 600    | 6.0  | 0.6 | 1,399 |
| Paraguay              | 1,300  | 12.4 | 1.3 | 1,569 |
| Peru                  | 10,900 | 17.1 | 1.6 | 2,179 |
| Philippines           | 12,500 | 8.9  | 0.7 | 1,763 |
| Poland                | 28,000 | 15.4 | 4.4 | 1,672 |
| Portugal              | 11,400 | 20.6 | 6.4 | 1,739 |
| Puerto Rico           | 2,200  | 15.9 | 4.0 | 1,552 |
| Qatar                 | 50     | 4.3  | 0.2 | 1,134 |
| Romania               | 11,600 | 14.2 | 4.7 | 1,240 |
| Russian Federation    | 60,000 | 11.4 | 3.8 | 1,076 |
| Rwanda                | 600    | 6.0  | 0.4 | 1,216 |
| Saint Lucia           | 50     | 13.0 | 2.5 | 1,055 |
| Samoa                 | 30     | 8.5  | 1.2 | 1,191 |
| Sao Tome and Principe | 10     | 9.3  | 0.7 | 642   |
| Saudi Arabia          | 1,200  | 4.9  | 0.5 | 735   |
| Senegal               | 500    | 5.5  | 0.4 | 953   |
| Serbia                | 3,700  | 8.0  | 3.9 | 1,051 |
| Sierra Leone          | 100    | 2.8  | 0.2 | 830   |
| Singapore             | 5,600  | 21.8 | 2.7 | 3,615 |
| Slovakia              | 3,700  | 13.1 | 3.2 | 2,099 |
| Slovenia              | 2,300  | 17.7 | 5.4 | 2,062 |
| Solomon Islands       | 10     | 1.8  | 0.5 | 283   |
| Somalia               | 200    | 3.0  | 0.3 | 609   |
| South Africa          | 9,000  | 8.9  | 0.8 | 1,954 |
| South Sudan           | 400    | 5.0  | 0.4 | 812   |
| Spain                 | 50,100 | 20.1 | 6.3 | 1,720 |
| Sri Lanka             | 1,800  | 7.8  | 1.6 | 536   |
| Sudan                 | 1,400  | 5.5  | 0.5 | 694   |
| Suriname              | 100    | 12.3 | 1.3 | 1,636 |
| Swaziland             | 80     | 7.7  | 0.4 | 1,452 |
| Sweden                | 9,900  | 17.8 | 5.2 | 1,936 |
| Switzerland           | 8,600  | 19.1 | 5.2 | 1,960 |
| Syrian Arab Republic  | 2,100  | 9.3  | 0.8 | 1,476 |
| Tajikistan            | 400    | 7.9  | 0.8 | 631   |
| Tanzania              | 3,000  | 7.4  | 0.5 | 1,110 |
| Thailand              | 21,800 | 13.0 | 2.5 | 1,267 |
| The Gambia            | 10     | 2.0  | 0.3 | 275   |
| The Netherlands       | 17,400 | 16.7 | 4.7 | 2,177 |
| Timor-Leste           | 30     | 4.4  | 0.4 | 560   |

|                          |         |      |     |       |
|--------------------------|---------|------|-----|-------|
| Togo                     | 100     | 3.9  | 0.3 | 826   |
| Trinidad and Tobago      | 300     | 10.0 | 1.8 | 1,375 |
| Tunisia                  | 1,700   | 11.6 | 1.7 | 914   |
| Turkey                   | 20,900  | 10.3 | 1.6 | 1,583 |
| Turkmenistan             | 300     | 5.4  | 0.9 | 594   |
| Uganda                   | 1,400   | 4.4  | 0.3 | 1,032 |
| Ukraine                  | 15,200  | 9.3  | 4.2 | 782   |
| United Arab Emirates     | 100     | 3.2  | 0.1 | 1,249 |
| United Kingdom           | 94,300  | 23.5 | 5.2 | 2,745 |
| United States of America | 265,600 | 15.7 | 3.8 | 2,122 |
| Uruguay                  | 2,900   | 20.6 | 4.4 | 1,910 |
| Uzbekistan               | 2,100   | 8.6  | 1.0 | 666   |
| Vanuatu                  | 10      | 4.5  | 0.5 | 645   |
| Venezuela                | 6,800   | 11.7 | 1.3 | 1,623 |
| Viet Nam                 | 14,000  | 8.6  | 2.1 | 708   |
| Yemen                    | 600     | 4.6  | 0.3 | 609   |
| Zambia                   | 600     | 5.5  | 0.4 | 961   |
| Zimbabwe                 | 1,600   | 9.4  | 0.5 | 1,894 |

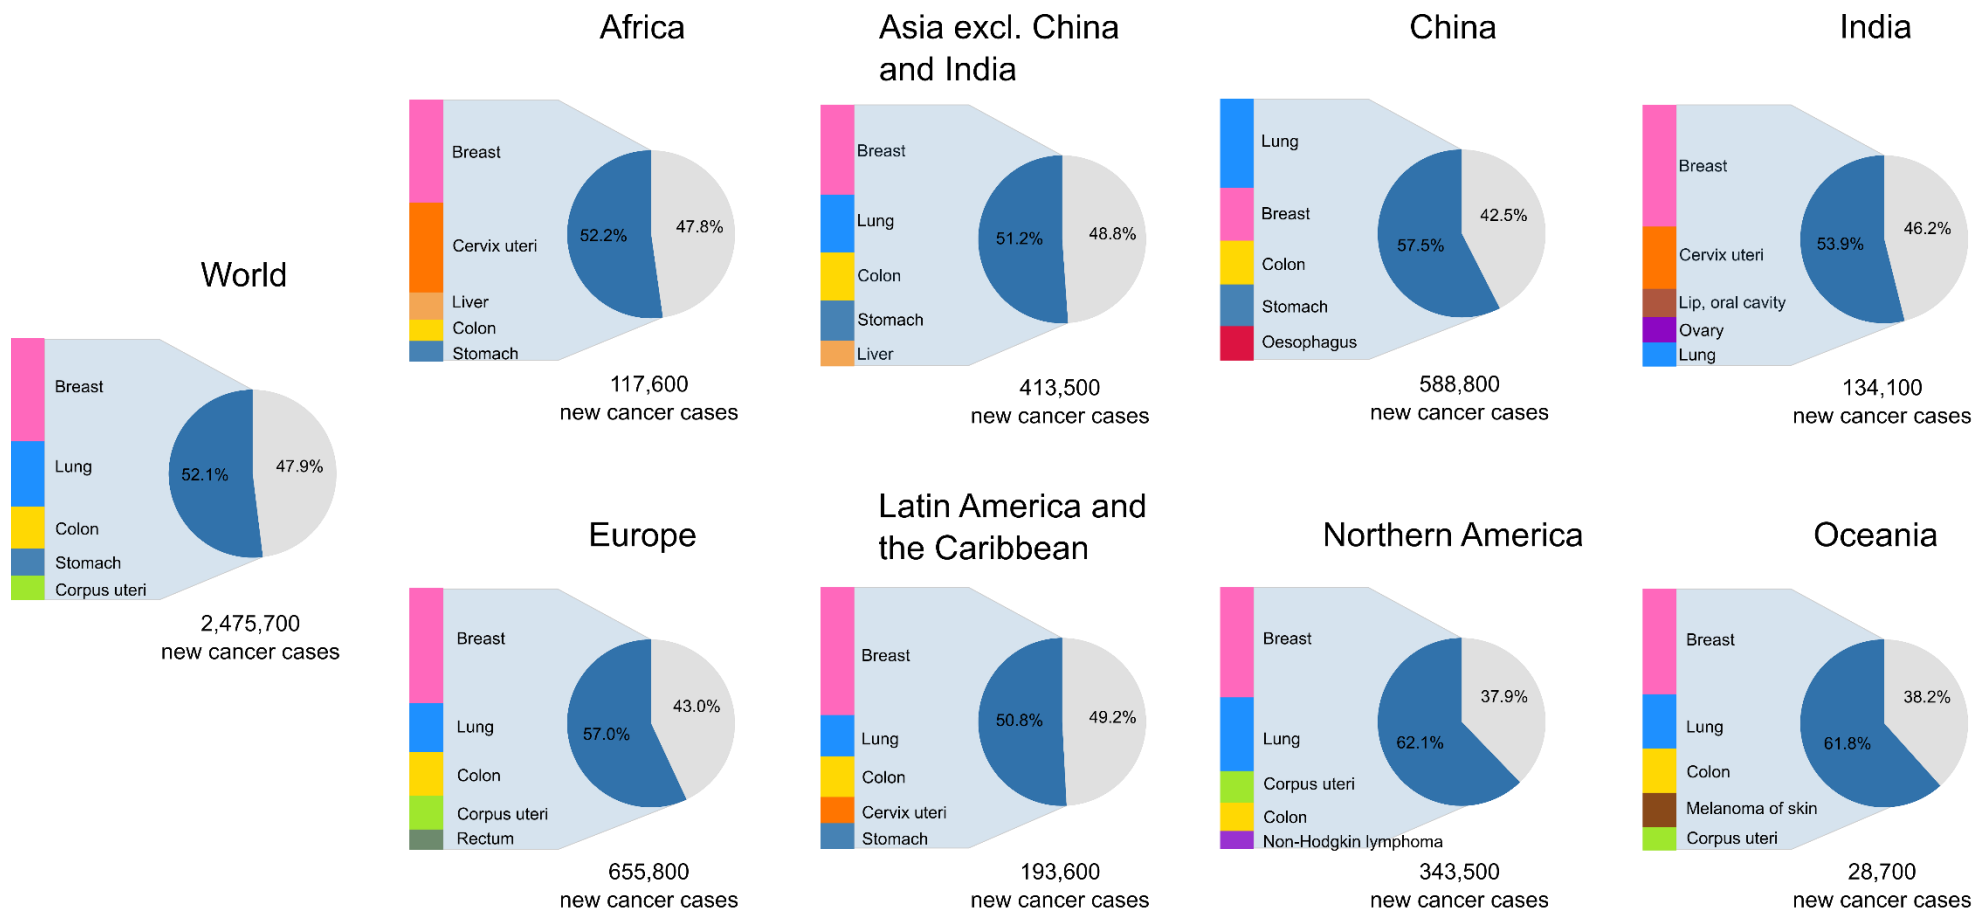

Supplementary Figure 1. Cancer profile in females aged 65-79 years by world region, 2018

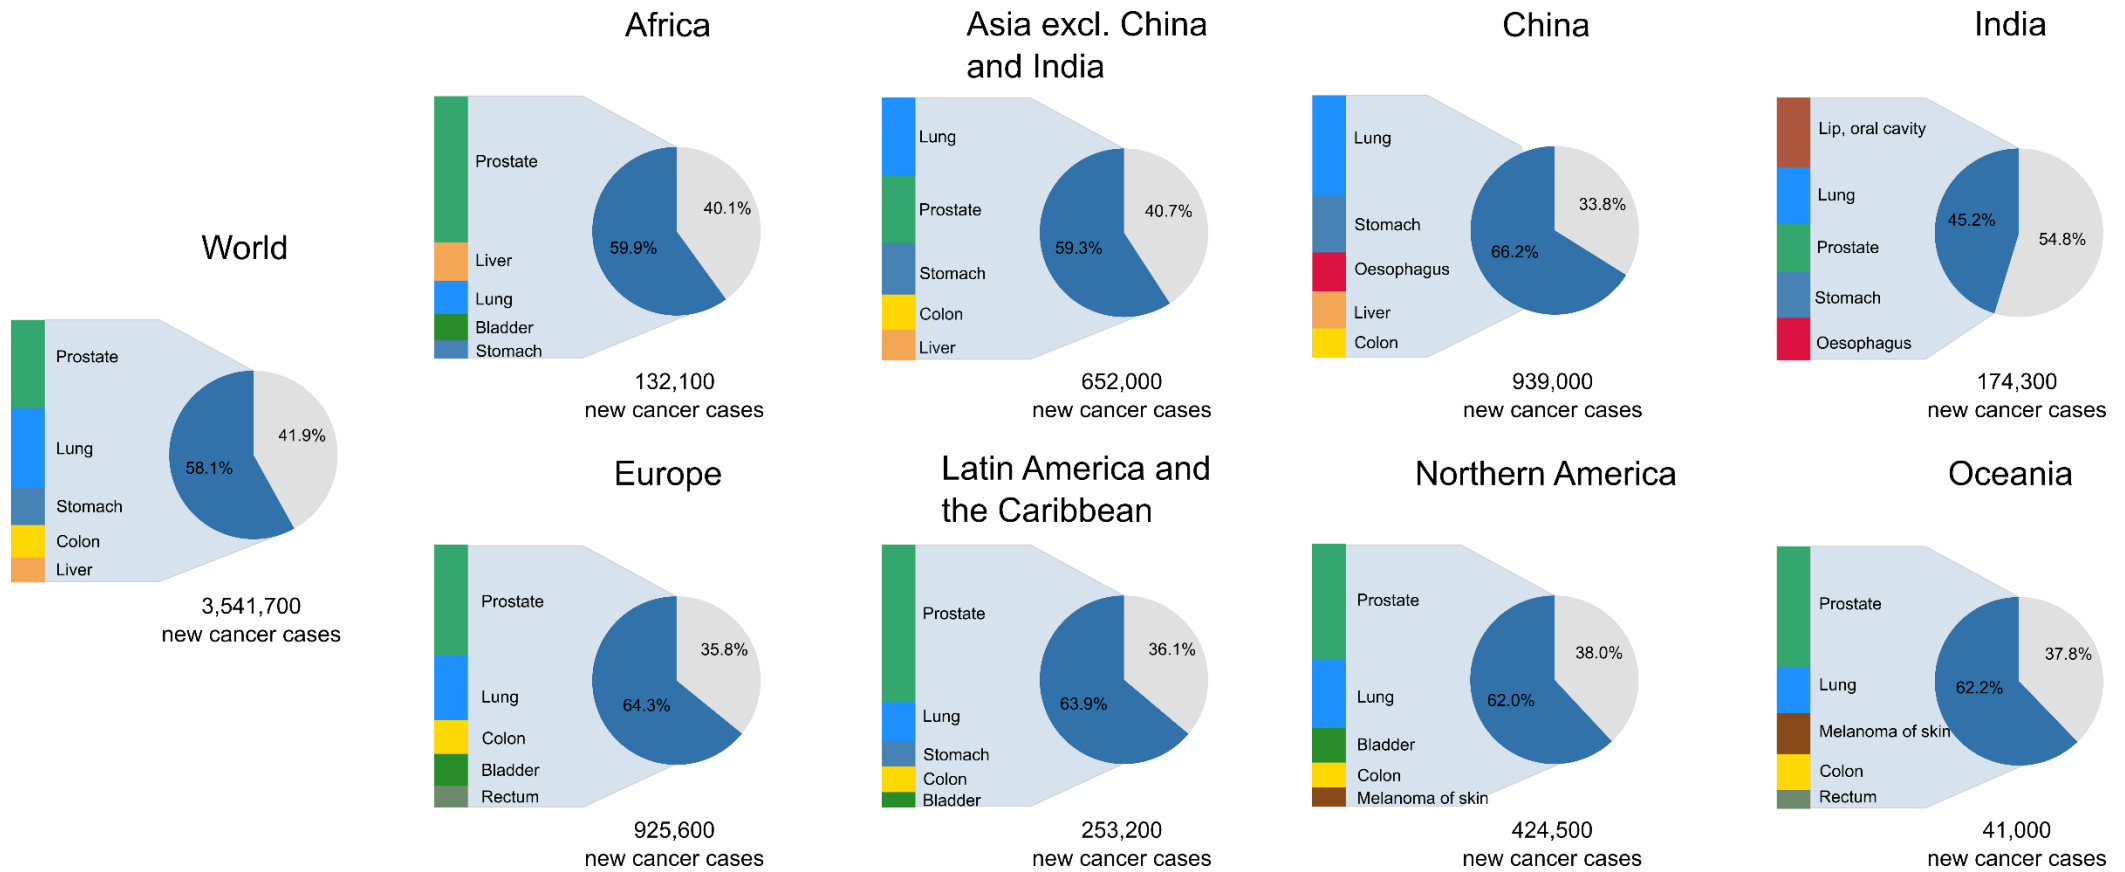

Supplementary Figure 2. Cancer profile in males aged 65-79 years by world region, 2018
